# Supplementary material for: Incidence of Surgical Site Infection After Spine Surgery: What Is the Impact of the Definition of Infection?
Source: Springer Nature journal article supplement (doi:10.1007/s11999-014-3933-y), 2014-09-11
Supplement: MOESM1 [file 11999_2014_3933_MOESM1_ESM.doc]

| **Appendix 1.** Included CPT codes within the 22010-22899 and 62263-63746 range | | |
| --- | --- | --- |
| Category | CPT code | Description |
| Excision Procedures on the Spine (Vertebral Column) | 22100 | Partial excision of posterior vertebral component (eg, spinous process, lamina or facet) for intrinsic bony lesion, single vertebral segment; cervical |
| Excision Procedures on the Spine (Vertebral Column) | 22101 | Partial excision of posterior vertebral component (eg, spinous process, lamina or facet) for intrinsic bony lesion, single vertebral segment; thoracic |
| Excision Procedures on the Spine (Vertebral Column) | 22102 | Partial excision of posterior vertebral component (eg, spinous process, lamina or facet) for intrinsic bony lesion, single vertebral segment; lumbar |
| Excision Procedures on the Spine (Vertebral Column) | 22103 | Partial excision of posterior vertebral component (eg, spinous process, lamina or facet) for intrinsic bony lesion, single vertebral segment; each additional segment (list separately in addition to code for primary procedure) |
| Excision Procedures on the Spine (Vertebral Column) | 22110 | Partial excision of vertebral body, for intrinsic bony lesion, without decompression of spinal cord or nerve root(s), single vertebral segment; cervical |
| Excision Procedures on the Spine (Vertebral Column) | 22112 | Partial excision of vertebral body, for intrinsic bony lesion, without decompression of spinal cord or nerve root(s), single vertebral segment; thoracic |
| Excision Procedures on the Spine (Vertebral Column) | 22114 | Partial excision of vertebral body, for intrinsic bony lesion, without decompression of spinal cord or nerve root(s), single vertebral segment; lumbar |
| Excision Procedures on the Spine (Vertebral Column) | 22116 | Partial excision of vertebral body, for intrinsic bony lesion, without decompression of spinal cord or nerve root(s), single vertebral segment; each additional vertebral segment (list separately in addition to code for primary procedure) |
| Osteotomy Procedures on the Spine (Vertebral Column) | 22206 | Osteotomy of spine, posterior or posterolateral approach, 3 columns, 1 vertebral segment (eg, pedicle/vertebral body subtraction); thoracic |
| Osteotomy Procedures on the Spine (Vertebral Column) | 22207 | Osteotomy of spine, posterior or posterolateral approach, 3 columns, 1 vertebral segment (eg, pedicle/vertebral body subtraction); lumbar |
| Osteotomy Procedures on the Spine (Vertebral Column) | 22208 | Osteotomy of spine, posterior or posterolateral approach, 3 columns, 1 vertebral segment (eg, pedicle/vertebral body subtraction); each additional vertebral segment (list separately in addition to code for primary procedure) |
| Osteotomy Procedures on the Spine (Vertebral Column) | 22210 | Osteotomy of spine, posterior or posterolateral approach, 1 vertebral segment; cervical |
| Osteotomy Procedures on the Spine (Vertebral Column) | 22212 | Osteotomy of spine, posterior or posterolateral approach, 1 vertebral segment; thoracic |
| Osteotomy Procedures on the Spine (Vertebral Column) | 22214 | Osteotomy of spine, posterior or posterolateral approach, 1 vertebral segment; lumbar |
| Osteotomy Procedures on the Spine (Vertebral Column) | 22216 | Osteotomy of spine, posterior or posterolateral approach, 1 vertebral segment; each additional vertebral segment (list separately in addition to primary procedure) |
| Osteotomy Procedures on the Spine (Vertebral Column) | 22220 | Osteotomy of spine, including discectomy, anterior approach, single vertebral segment; cervical |
| Osteotomy Procedures on the Spine (Vertebral Column) | 22222 | Osteotomy of spine, including discectomy, anterior approach, single vertebral segment; thoracic |
| Osteotomy Procedures on the Spine (Vertebral Column) | 22224 | Osteotomy of spine, including discectomy, anterior approach, single vertebral segment; lumbar |
| Osteotomy Procedures on the Spine (Vertebral Column) | 22226 | Osteotomy of spine, including discectomy, anterior approach, single vertebral segment; each additional vertebral segment (list separately in addition to code for primary procedure) |
| Fracture and/or Dislocation Procedures on the Spine (Vertebral Column) | 22318 | Open treatment and/or reduction of odontoid fracture(s) and or dislocation(s) (including os odontoideum), anterior approach, including placement of internal fixation; without grafting |
| Fracture and/or Dislocation Procedures on the Spine (Vertebral Column) | 22319 | Open treatment and/or reduction of odontoid fracture(s) and or dislocation(s) (including os odontoideum), anterior approach, including placement of internal fixation; with grafting |
| Fracture and/or Dislocation Procedures on the Spine (Vertebral Column) | 22325 | Open treatment and/or reduction of vertebral fracture(s) and/or dislocation(s), posterior approach, 1 fractured vertebra or dislocated segment; lumbar |
| Fracture and/or Dislocation Procedures on the Spine (Vertebral Column) | 22326 | Open treatment and/or reduction of vertebral fracture(s) and/or dislocation(s), posterior approach, 1 fractured vertebra or dislocated segment; cervical |
| Fracture and/or Dislocation Procedures on the Spine (Vertebral Column) | 22327 | Open treatment and/or reduction of vertebral fracture(s) and/or dislocation(s), posterior approach, 1 fractured vertebra or dislocated segment; thoracic |
| Fracture and/or Dislocation Procedures on the Spine (Vertebral Column) | 22328 | Open treatment and/or reduction of vertebral fracture(s) and/or dislocation(s), posterior approach, 1 fractured vertebra or dislocated segment; each additional fractured vertebra or dislocated segment (list separately in addition to code for primary procedure) |
| Arthrodesis Procedures on the Spine (Vertebral Column) | 22532 | Arthrodesis, lateral extracavitary technique, including minimal discectomy to prepare interspace (other than for decompression); thoracic |
| Arthrodesis Procedures on the Spine (Vertebral Column) | 22533 | Arthrodesis, lateral extracavitary technique, including minimal discectomy to prepare interspace (other than for decompression); lumbar |
| Arthrodesis Procedures on the Spine (Vertebral Column) | 22534 | Arthrodesis, lateral extracavitary technique, including minimal discectomy to prepare interspace (other than for decompression); thoracic or lumbar, each additional vertebral segment (list separately in addition to code for primary procedure) |
| Arthrodesis Procedures on the Spine (Vertebral Column) | 22548 | Arthrodesis, anterior transoral or extraoral technique, clivus-C1-C2 (atlas-axis), with or without excision of odontoid process |
| Arthrodesis Procedures on the Spine (Vertebral Column) | 22551 | Arthrodesis, anterior interbody, including disc space preparation, discectomy, osteophytectomy and decompression of spinal cord and/or nerve roots; cervical below C2 |
| Arthrodesis Procedures on the Spine (Vertebral Column) | 22552 | Arthrodesis, anterior interbody, including disc space preparation, discectomy, osteophytectomy and decompression of spinal cord and/or nerve roots; cervical below C2, each additional interspace (list separately in addition to code for separate procedure) |
| Arthrodesis Procedures on the Spine (Vertebral Column) | 22554 | Arthrodesis, anterior interbody technique, including minimal discectomy to prepare interspace (other than for decompression); cervical below C2 |
| Arthrodesis Procedures on the Spine (Vertebral Column) | 22556 | Arthrodesis, anterior interbody technique, including minimal discectomy to prepare interspace (other than for decompression); thoracic |
| Arthrodesis Procedures on the Spine (Vertebral Column) | 22558 | Arthrodesis, anterior interbody technique, including minimal discectomy to prepare interspace (other than for decompression); lumbar |
| Arthrodesis Procedures on the Spine (Vertebral Column) | 22585 | Arthrodesis, anterior interbody technique, including minimal discectomy to prepare interspace (other than for decompression); each additional interspace (list separately in addition to code for primary procedure) |
| Arthrodesis Procedures on the Spine (Vertebral Column) | 22586 | Arthrodesis, presacral interbody technique, including disc space preparation, discectomy, with posterior instrumentation, with image guidance, includes bone graft when performed, L5-S1 interspace |
| Arthrodesis Procedures on the Spine (Vertebral Column) | 22590 | Arthrodesis, posterior technique, craniocervical (occiput-C2) |
| Arthrodesis Procedures on the Spine (Vertebral Column) | 22595 | Arthrodesis, posterior technique, atlas-axis (C1-C2) |
| Arthrodesis Procedures on the Spine (Vertebral Column) | 22600 | Arthrodesis, posterior or posterolateral technique, single level; cervical below C2 segment |
| Arthrodesis Procedures on the Spine (Vertebral Column) | 22610 | Arthrodesis, posterior or posterolateral technique, single level; thoracic (with lateral transverse technique, when performed) |
| Arthrodesis Procedures on the Spine (Vertebral Column) | 22612 | Arthrodesis, posterior or posterolateral technique, single level; lumbar (with lateral transverse technique, when performed) |
| Arthrodesis Procedures on the Spine (Vertebral Column) | 22614 | Arthrodesis, posterior or posterolateral technique, single level; each additional vertebral segment (list separately in addition to code for primary procedure) |
| Arthrodesis Procedures on the Spine (Vertebral Column) | 22630 | Arthrodesis, posterior interbody technique, including laminectomy and/or discectomy to prepare interspace (other than for decompression), single interspace; lumbar |
| Arthrodesis Procedures on the Spine (Vertebral Column) | 22632 | Arthrodesis, posterior interbody technique, including laminectomy and/or discectomy to prepare interspace (other than for decompression), single interspace; each additional interspace (list separately in addition to code for primary procedure) |
| Arthrodesis Procedures on the Spine (Vertebral Column) | 22633 | Arthrodesis, combined posterior or posterolateral technique with posterior interbody technique including laminectomy and/or discectomy sufficient to prepare interspace (other than for decompression), single interspace and segment; lumbar |
| Arthrodesis Procedures on the Spine (Vertebral Column) | 22634 | Arthrodesis, combined posterior or posterolateral technique with posterior interbody technique including laminectomy and/or discectomy sufficient to prepare interspace (other than for decompression), single interspace and segment; each additional interspace and segment (list separately in addition to code for primary procedure) |
| Arthrodesis Procedures on the Spine (Vertebral Column) | 22800 | Arthrodesis, posterior, for spinal deformity, with or without cast; up to 6 vertebral segments |
| Arthrodesis Procedures on the Spine (Vertebral Column) | 22802 | Arthrodesis, posterior, for spinal deformity, with or without cast; 7 to 12 vertebral segments |
| Arthrodesis Procedures on the Spine (Vertebral Column) | 22804 | Arthrodesis, posterior, for spinal deformity, with or without cast; 13 or more vertebral segments |
| Arthrodesis Procedures on the Spine (Vertebral Column) | 22808 | Arthrodesis, anterior, for spinal deformity, with or without cast; 2 to 3 vertebral segments |
| Arthrodesis Procedures on the Spine (Vertebral Column) | 22810 | Arthrodesis, anterior, for spinal deformity, with or without cast; 4 to 7 vertebral segments |
| Arthrodesis Procedures on the Spine (Vertebral Column) | 22812 | Arthrodesis, anterior, for spinal deformity, with or without cast; 8 or more vertebral segments |
| Arthrodesis Procedures on the Spine (Vertebral Column) | 22818 | Kyphectomy, circumferential exposure of spine and resection of vertebral segment(s) (including body and posterior elements); single or 2 segments |
| Arthrodesis Procedures on the Spine (Vertebral Column) | 22819 | Kyphectomy, circumferential exposure of spine and resection of vertebral segment(s) (including body and posterior elements); 3 or more segments |
| Spinal Instrumentation Procedures on the Spine (Vertebral Column) | 22840 | Posterior nonsegmental instrumentation (eg, Harrington rod technique, pedicle fixation across 1 interspace, atlantoaxial transarticular screw fixation, sublaminar wiring at C1, facet screw fixation) (list separately in addition to code for primary procedure) |
| Spinal Instrumentation Procedures on the Spine (Vertebral Column) | 22841 | Internal spinal fixation by wiring of spinous processes (list separately in addition to code for primary procedure) |
| Spinal Instrumentation Procedures on the Spine (Vertebral Column) | 22842 | Posterior segmental instrumentation (eg, pedicle fixation, dual rods with multiple hooks and sublaminar wires); 3 to 6 vertebral segments (list separately in addition to code for primary procedure) |
| Spinal Instrumentation Procedures on the Spine (Vertebral Column) | 22843 | Posterior segmental instrumentation (eg, pedicle fixation, dual rods with multiple hooks and sublaminar wires); 7 to 12 vertebral segments (list separately in addition to code for primary procedure) |
| Spinal Instrumentation Procedures on the Spine (Vertebral Column) | 22844 | Posterior segmental instrumentation (eg, pedicle fixation, dual rods with multiple hooks and sublaminar wires); 13 or more vertebral segments (list separately in addition to code for primary procedure) |
| Spinal Instrumentation Procedures on the Spine (Vertebral Column) | 22845 | Anterior instrumentation; 2 to 3 vertebral segments (list separately in addition to code for primary procedure) |
| Spinal Instrumentation Procedures on the Spine (Vertebral Column) | 22846 | Anterior instrumentation; 4 to 7 vertebral segments (list separately in addition to code for primary procedure) |
| Spinal Instrumentation Procedures on the Spine (Vertebral Column) | 22847 | Anterior instrumentation; 8 or more vertebral segments (list separately in addition to code for primary procedure) |
| Spinal Instrumentation Procedures on the Spine (Vertebral Column) | 22849 | Reinsertion of spinal fixation device |
| Spinal Instrumentation Procedures on the Spine (Vertebral Column) | 22850 | Removal of posterior nonsegmental instrumentation (eg, Harrington rod) |
| Spinal Instrumentation Procedures on the Spine (Vertebral Column) | 22851 | Application of intervertebral biomechanical device(s) (eg, synthetic cage[s], methylmethacrylate) to vertebral defect or interspace (list separately in addition to code for primary procedure) |
| Spinal Instrumentation Procedures on the Spine (Vertebral Column) | 22852 | Removal of posterior segmental instrumentation |
| Spinal Instrumentation Procedures on the Spine (Vertebral Column) | 22855 | Removal of anterior instrumentation |
| Spinal Instrumentation Procedures on the Spine (Vertebral Column) | 22856 | Total disc arthroplasty (artificial disc), anterior approach, including discectomy with end plate preparation (includes osteophytectomy for nerve root or spinal cord decompression and microdissection), single interspace, cervical |
| Spinal Instrumentation Procedures on the Spine (Vertebral Column) | 22857 | Total disc arthroplasty (artificial disc), anterior approach, including discectomy to prepare interspace (other than for decompression), single interspace, lumbar |
| Spinal Instrumentation Procedures on the Spine (Vertebral Column) | 22861 | Revision including replacement of total disc arthroplasty (artificial disc), anterior approach, single interspace; cervical |
| Spinal Instrumentation Procedures on the Spine (Vertebral Column) | 22862 | Revision including replacement of total disc arthroplasty (artificial disc), anterior approach, single interspace; lumbar |
| Spinal Instrumentation Procedures on the Spine (Vertebral Column) | 22864 | Removal of total disc arthroplasty (artificial disc), anterior approach, single interspace; cervical |
| Spinal Instrumentation Procedures on the Spine (Vertebral Column) | 22865 | Removal of total disc arthroplasty (artificial disc), anterior approach, single interspace; lumbar |
| Posterior Extradural Laminotomy or Laminectomy for Exploration/ Decompression of Neural Elements or Excision of Herniated Intervertebral Disks Procedures | 63001 | Laminectomy with exploration and/or decompression of spinal cord and/or cauda equina, without facetectomy, foraminotomy, or discectomy (eg, spinal stenosis), 1 or 2 vertebral segments; cervical |
| Posterior Extradural Laminotomy or Laminectomy for Exploration/ Decompression of Neural Elements or Excision of Herniated Intervertebral Disks Procedures | 63003 | Laminectomy with exploration and/or decompression of spinal cord and/or cauda equina, without facetectomy, foraminotomy, or discectomy (eg, spinal stenosis), 1 or 2 vertebral segments; thoracic |
| Posterior Extradural Laminotomy or Laminectomy for Exploration/ Decompression of Neural Elements or Excision of Herniated Intervertebral Disks Procedures | 63005 | Laminectomy with exploration and/or decompression of spinal cord and/or cauda equina, without facetectomy, foraminotomy, or discectomy (eg, spinal stenosis), 1 or 2 vertebral segments; lumbar, except for spondylolisthesis |
| Posterior Extradural Laminotomy or Laminectomy for Exploration/ Decompression of Neural Elements or Excision of Herniated Intervertebral Disks Procedures | 63011 | Laminectomy with exploration and/or decompression of spinal cord and/or cauda equina, without facetectomy, foraminotomy, or discectomy (eg, spinal stenosis), 1 or 2 vertebral segments; sacral |
| Posterior Extradural Laminotomy or Laminectomy for Exploration/ Decompression of Neural Elements or Excision of Herniated Intervertebral Disks Procedures | 63012 | Laminectomy with removal of abnormal facets and/or pars interarticularis with decompression of cauda equina and nerve roots for spondylolisthesis, lumbar (Gill-type procedure) |
| Posterior Extradural Laminotomy or Laminectomy for Exploration/ Decompression of Neural Elements or Excision of Herniated Intervertebral Disks Procedures | 63015 | Laminectomy with exploration and/or decompression of spinal cord and/or cauda equina, without facetectomy, foraminotomy, or discectomy (eg, spinal stenosis), more than 2 vertebral segments; cervical |
| Posterior Extradural Laminotomy or Laminectomy for Exploration/ Decompression of Neural Elements or Excision of Herniated Intervertebral Disks Procedures | 63016 | Laminectomy with exploration and/or decompression of spinal cord and/or cauda equina, without facetectomy, foraminotomy, or discectomy (eg, spinal stenosis), more than 2 vertebral segments; thoracic |
| Posterior Extradural Laminotomy or Laminectomy for Exploration/ Decompression of Neural Elements or Excision of Herniated Intervertebral Disks Procedures | 63017 | Laminectomy with exploration and/or decompression of spinal cord and/or cauda equina, without facetectomy, foraminotomy, or discectomy (eg, spinal stenosis), more than 2 vertebral segments; lumbar |
| Posterior Extradural Laminotomy or Laminectomy for Exploration/ Decompression of Neural Elements or Excision of Herniated Intervertebral Disks Procedures | 63020 | Laminotomy (hemilaminectomy), with decompression of nerve root(s), including partial facetectomy, foraminotomy, and/or excision of herniated intervertebral disc; 1 interspace, cervical |
| Posterior Extradural Laminotomy or Laminectomy for Exploration/ Decompression of Neural Elements or Excision of Herniated Intervertebral Disks Procedures | 63030 | Laminotomy (hemilaminectomy), with decompression of nerve root(s), including partial facetectomy, foraminotomy, and/or excision of herniated intervertebral disc; 1 interspace, lumbar |
| Posterior Extradural Laminotomy or Laminectomy for Exploration/ Decompression of Neural Elements or Excision of Herniated Intervertebral Disk Procedures | 63035 | Laminotomy (hemilaminectomy), with decompression of nerve root(s), including partial facetectomy, foraminotomy, and/or excision of herniated intervertebral disc; each additional interspace, cervical or lumbar (list separately in addition to code for primary procedure) |
| Posterior Extradural Laminotomy or Laminectomy for Exploration/ Decompression of Neural Elements or Excision of Herniated Intervertebral Disks Procedures | 63040 | Laminotomy (hemilaminectomy), with decompression of nerve root(s), including partial facetectomy, foraminotomy, and/or excision of herniated intervertebral disc, reexploration, single interspace; cervical |
| Posterior Extradural Laminotomy or Laminectomy for Exploration/ Decompression of Neural Elements or Excision of Herniated Intervertebral Disks Procedures | 63042 | Laminotomy (hemilaminectomy), with decompression of nerve root(s), including partial facetectomy, foraminotomy, and/or excision of herniated intervertebral disc, reexploration, single interspace; lumbar |
| Posterior Extradural Laminotomy or Laminectomy for Exploration/ Decompression of Neural Elements or Excision of Herniated Intervertebral Disks Procedures | 63043 | Laminotomy (hemilaminectomy), with decompression of nerve root(s), including partial facetectomy, foraminotomy, and/or excision of herniated intervertebral disc, reexploration, single interspace; each additional cervical interspace (list separately in addition to code for primary procedure) |
| Posterior Extradural Laminotomy or Laminectomy for Exploration/ Decompression of Neural Elements or Excision of Herniated Intervertebral Disks Procedures | 63044 | Laminotomy (hemilaminectomy), with decompression of nerve root(s), including partial facetectomy, foraminotomy, and/or excision of herniated intervertebral disc, reexploration, single interspace; each additional lumbar interspace (list separately in addition to code for primary procedure) |
| Posterior Extradural Laminotomy or Laminectomy for Exploration/ Decompression of Neural Elements or Excision of Herniated Intervertebral Disks Procedures | 63045 | Laminectomy, facetectomy, and foraminotomy (unilateral or bilateral with decompression of spinal cord, cauda equina, and/or nerve root[s], [eg, spinal or lateral recess stenosis]), single vertebral segment; cervical |
| Posterior Extradural Laminotomy or Laminectomy for Exploration/ Decompression of Neural Elements or Excision of Herniated Intervertebral Disks Procedures | 63046 | Laminectomy, facetectomy, and foraminotomy (unilateral or bilateral with decompression of spinal cord, cauda equina, and/or nerve root[s], [eg, spinal or lateral recess stenosis]), single vertebral segment; thoracic |
| Posterior Extradural Laminotomy or Laminectomy for Exploration/ Decompression of Neural Elements or Excision of Herniated Intervertebral Disks Procedures | 63047 | Laminectomy, facetectomy, and foraminotomy (unilateral or bilateral with decompression of spinal cord, cauda equina, and/or nerve root[s], [eg, spinal or lateral recess stenosis]), single vertebral segment; lumbar |
| Posterior Extradural Laminotomy or Laminectomy for Exploration/ Decompression of Neural Elements or Excision of Herniated Intervertebral Disks Procedures | 63048 | Laminectomy, facetectomy, and foraminotomy (unilateral or bilateral with decompression of spinal cord, cauda equina, and/or nerve root[s], [eg, spinal or lateral recess stenosis]), single vertebral segment; each additional segment, cervical, thoracic, or lumbar (list separately in addition to code for primary procedure) |
| Posterior Extradural Laminotomy or Laminectomy for Exploration/ Decompression of Neural Elements or Excision of Herniated Intervertebral Disks Procedures | 63050 | Laminoplasty, cervical, with decompression of the spinal cord, 2 or more vertebral segments |
| Posterior Extradural Laminotomy or Laminectomy for Exploration/ Decompression of Neural Elements or Excision of Herniated Intervertebral Disks Procedures | 63051 | Laminoplasty, cervical, with decompression of the spinal cord, 2 or more vertebral segments; with reconstruction of the posterior bony elements (including the application of bridging bone graft and nonsegmental fixation devices (eg, wire, suture, miniplates), when performed) |
| Transpedicular or Costovertebral Approach for Posterolateral Extradural Exploration/Decompression Procedures on the Spine and Spinal Cord | 63055 | Transpedicular approach with decompression of spinal cord, equina, and/or nerve root(s) (eg, herniated intervertebral disc), single segment; thoracic |
| Transpedicular or Costovertebral Approach for Posterolateral Extradural Exploration/Decompression Procedures on the Spine and Spinal Cord | 63056 | Transpedicular approach with decompression of spinal cord, equina, and/or nerve root(s) (eg, herniated intervertebral disc), single segment; lumbar (including transfacet, or lateral extraforaminal approach) (eg, far lateral herniated intervertebral disc) |
| Transpedicular or Costovertebral Approach for Posterolateral Extradural Exploration/Decompression Procedures on the Spine and Spinal Cord | 63057 | Transpedicular approach with decompression of spinal cord, equina, and/or nerve root(s) (eg, herniated intervertebral disc), single segment; each additional segment, thoracic or lumbar (list separately in addition to code for primary procedure) |
| Transpedicular or Costovertebral Approach for Posterolateral Extradural Exploration/Decompression Procedures on the Spine and Spinal Cord | 63064 | Costovertebral approach with decompression of spinal cord or nerve root(s) (eg, herniated intervertebral disc), thoracic; single segment |
| Transpedicular or Costovertebral Approach for Posterolateral Extradural Exploration/Decompression Procedures on the Spine and Spinal Cord | 63066 | Costovertebral approach with decompression of spinal cord or nerve root(s) (eg, herniated intervertebral disc), thoracic; each additional segment (list separately in addition to code for primary procedure) |
| Anterior or Anterolateral Approach for Extradural Exploration/Decompression Procedures on the Spine and Spinal Cord | 63075 | Discectomy, anterior, with decompression of spinal cord and/or nerve root(s), including osteophytectomy; cervical, single interspace |
| Anterior or Anterolateral Approach for Extradural Exploration/Decompression Procedures on the Spine and Spinal Cord | 63076 | Discectomy, anterior, with decompression of spinal cord and/or nerve root(s), including osteophytectomy; cervical, each additional interspace (list separately in addition to code for primary procedure) |
| Anterior or Anterolateral Approach for Extradural Exploration/Decompression Procedures on the Spine and Spinal Cord | 63077 | Discectomy, anterior, with decompression of spinal cord and/or nerve root(s), including osteophytectomy; thoracic, single interspace |
| Anterior or Anterolateral Approach for Extradural Exploration/Decompression Procedures on the Spine and Spinal Cord | 63078 | Discectomy, anterior, with decompression of spinal cord and/or nerve root(s), including osteophytectomy; thoracic, each additional interspace (list separately in addition to code for primary procedure) |
| Anterior or Anterolateral Approach for Extradural Exploration/Decompression Procedures on the Spine and Spinal Cord | 63081 | Vertebral corpectomy (vertebral body resection), partial or complete, anterior approach with decompression of spinal cord and/or nerve root(s); cervical, single segment |
| Anterior or Anterolateral Approach for Extradural Exploration/Decompression Procedures on the Spine and Spinal Cord | 63082 | Vertebral corpectomy (vertebral body resection), partial or complete, anterior approach with decompression of spinal cord and/or nerve root(s); cervical, each additional segment (list separately in addition to code for primary procedure) |
| Anterior or Anterolateral Approach for Extradural Exploration/Decompression Procedures on the Spine and Spinal Cord | 63085 | Vertebral corpectomy (vertebral body resection), partial or complete, transthoracic approach with decompression of spinal cord and/or nerve root(s); thoracic, single segment |
| Anterior or Anterolateral Approach for Extradural Exploration/Decompression Procedures on the Spine and Spinal Cord | 63086 | Vertebral corpectomy (vertebral body resection), partial or complete, transthoracic approach with decompression of spinal cord and/or nerve root(s); thoracic, each additional segment (list separately in addition to code for primary procedure) |
| Anterior or Anterolateral Approach for Extradural Exploration/Decompression Procedures on the Spine and Spinal Cord | 63087 | Vertebral corpectomy (vertebral body resection), partial or complete, combined thoracolumbarapproach with decompression of spinal cord, cauda equina or nerve root(s), lower thoracic or lumbar; single segment |
| Anterior or Anterolateral Approach for Extradural Exploration/Decompression Procedures on the Spine and Spinal Cord | 63088 | Vertebral corpectomy (vertebral body resection), partial or complete, combined thoracolumbarapproach with decompression of spinal cord, cauda equina or nerve root(s), lower thoracic or lumbar; each additional segment (list separately in addition to code for primary procedure) |
| Anterior or Anterolateral Approach for Extradural Exploration/Decompression Procedures on the Spine and Spinal Cord | 63090 | Vertebral corpectomy (vertebral body resection), partial or complete, transperitoneal orretroperitoneal approach with decompression of spinal cord, cauda equina, or nerve root(s), lower thoracic, lumbar, or sacral; single segment |
| Anterior or Anterolateral Approach for Extradural Exploration/Decompression Procedures on the Spine and Spinal Cord | 63091 | Vertebral corpectomy (vertebral body resection), partial or complete, transperitoneal orretroperitoneal approach with decompression of spinal cord, cauda equina, or nerve root(s), lower thoracic, lumbar, or sacral; each additional segment (list separately in addition to code for primary procedure) |
| Lateral Extracavitary Approach for Extradural Exploration/Decompression Procedures on the Spine and Spinal Cord | 63101 | Vertebral corpectomy (vertebral body resection), partial or complete, lateral extracavitary approachwith decompression of spinal cord and/or nerve root(s) (eg, for tumor or retropulsed bone fragments); thoracic, single segment |
| Lateral Extracavitary Approach for Extradural Exploration/Decompression Procedures on the Spine and Spinal Cord | 63102 | Vertebral corpectomy (vertebral body resection), partial or complete, lateral extracavitary approachwith decompression of spinal cord and/or nerve root(s) (eg, for tumor or retropulsed bone fragments); lumbar, single segment |
| Lateral Extracavitary Approach for Extradural Exploration/Decompression Procedures on the Spine and Spinal Cord | 63103 | Vertebral corpectomy (vertebral body resection), partial or complete, lateral extracavitary approach with decompression of spinal cord and/or nerve root(s) (eg, for tumor or retropulsed bone fragments); thoracic or lumbar, each additional segment (list separately in addition to code for primary procedure) |
| Incision Procedures on the Spine and Spinal Cord | 63170 | Laminectomy with myelotomy (eg, Bischof or DREZ type), cervical, thoracic, or thoracolumbar |
| Incision Procedures on the Spine and Spinal Cord | 63172 | Laminectomy with drainage of intramedullary cyst/syrinx; to subarachnoid space |
| Incision Procedures on the Spine and Spinal Cord | 63173 | Laminectomy with drainage of intramedullary cyst/syrinx; to peritoneal or pleural space |
| Incision Procedures on the Spine and Spinal Cord | 63180 | Laminectomy and section of dentate ligaments, with or without dural graft, cervical; 1 or 2 segments |
| Incision Procedures on the Spine and Spinal Cord | 63182 | Laminectomy and section of dentate ligaments, with or without dural graft, cervical; more than 2 segments |
| Incision Procedures on the Spine and Spinal Cord | 63185 | Laminectomy with rhizotomy; 1 or 2 segments |
| Incision Procedures on the Spine and Spinal Cord | 63190 | Laminectomy with rhizotomy; more than 2 segments |
| Incision Procedures on the Spine and Spinal Cord | 63191 | Laminectomy with section of spinal accessory nerve |
| Incision Procedures on the Spine and Spinal Cord | 63194 | Laminectomy with cordotomy, with section of 1 spinothalamic tract, 1 stage; cervical |
| Incision Procedures on the Spine and Spinal Cord | 63195 | Laminectomy with cordotomy, with section of 1 spinothalamic tract, 1 stage; thoracic |
| Incision Procedures on the Spine and Spinal Cord | 63196 | Laminectomy with cordotomy, with section of both spinothalamic tracts, 1 stage; cervical |
| Incision Procedures on the Spine and Spinal Cord | 63197 | Laminectomy with cordotomy, with section of both spinothalamic tracts, 1 stage; thoracic |
| Incision Procedures on the Spine and Spinal Cord | 63198 | Laminectomy with cordotomy with section of both spinothalamic tracts, 2 stages within 14 days; cervical |
| Incision Procedures on the Spine and Spinal Cord | 63199 | Laminectomy with cordotomy with section of both spinothalamic tracts, 2 stages within 14 days; thoracic |
| Incision Procedures on the Spine and Spinal Cord | 63200 | Laminectomy, with release of tethered spinal cord, lumbar |
| Excision by Laminectomy of Lesion Other Than Herniated Disk Procedures | 63250 | Laminectomy for excision or occlusion of arteriovenous malformation of spinal cord; cervical |
| Excision by Laminectomy of Lesion Other Than Herniated Disk Procedures | 63251 | Laminectomy for excision or occlusion of arteriovenous malformation of spinal cord; thoracic |
| Excision by Laminectomy of Lesion Other Than Herniated Disk Procedures | 63252 | Laminectomy for excision or occlusion of arteriovenous malformation of spinal cord; thoracolumbar |
| Excision by Laminectomy of Lesion Other Than Herniated Disk Procedures | 63265 | Laminectomy for excision or evacuation of intraspinal lesion other than neoplasm, extradural; cervical |
| Excision by Laminectomy of Lesion Other Than Herniated Disk Procedures | 63266 | Laminectomy for excision or evacuation of intraspinal lesion other than neoplasm, extradural; thoracic |
| Excision by Laminectomy of Lesion Other Than Herniated Disk Procedures | 63267 | Laminectomy for excision or evacuation of intraspinal lesion other than neoplasm, extradural; lumbar |
| Excision by Laminectomy of Lesion Other Than Herniated Disk Procedures | 63268 | Laminectomy for excision or evacuation of intraspinal lesion other than neoplasm, extradural; sacral |
| Excision by Laminectomy of Lesion Other Than Herniated Disk Procedures | 63270 | Laminectomy for excision of intraspinal lesion other than neoplasm, intradural; cervical |
| Excision by Laminectomy of Lesion Other Than Herniated Disk Procedures | 63271 | Laminectomy for excision of intraspinal lesion other than neoplasm, intradural; thoracic |
| Excision by Laminectomy of Lesion Other Than Herniated Disk Procedures | 63272 | Laminectomy for excision of intraspinal lesion other than neoplasm, intradural; lumbar |
| Excision by Laminectomy of Lesion Other Than Herniated Disk Procedures | 63273 | Laminectomy for excision of intraspinal lesion other than neoplasm, intradural; sacral |
| Excision by Laminectomy of Lesion Other Than Herniated Disk Procedures | 63275 | Laminectomy for biopsy/excision of intraspinal neoplasm; extradural, cervical |
| Excision by Laminectomy of Lesion Other Than Herniated Disk Procedures | 63276 | Laminectomy for biopsy/excision of intraspinal neoplasm; extradural, thoracic |
| Excision by Laminectomy of Lesion Other Than Herniated Disk Procedures | 63277 | Laminectomy for biopsy/excision of intraspinal neoplasm; extradural, lumbar |
| Excision by Laminectomy of Lesion Other Than Herniated Disk Procedures | 63278 | Laminectomy for biopsy/excision of intraspinal neoplasm; extradural, sacral |
| Excision by Laminectomy of Lesion Other Than Herniated Disk Procedures | 63280 | Laminectomy for biopsy/excision of intraspinal neoplasm; intradural, extramedullary, cervical |
| Excision by Laminectomy of Lesion Other Than Herniated Disk Procedures | 63281 | Laminectomy for biopsy/excision of intraspinal neoplasm; intradural, extramedullary, thoracic |
| Excision by Laminectomy of Lesion Other Than Herniated Disk Procedures | 63282 | Laminectomy for biopsy/excision of intraspinal neoplasm; intradural, extramedullary, lumbar |
| Excision by Laminectomy of Lesion Other Than Herniated Disk Procedures | 63283 | Laminectomy for biopsy/excision of intraspinal neoplasm; intradural, sacral |
| Excision by Laminectomy of Lesion Other Than Herniated Disk Procedures | 63285 | Laminectomy for biopsy/excision of intraspinal neoplasm; intradural, intramedullary, cervical |
| Excision by Laminectomy of Lesion Other Than Herniated Disk Procedures | 63286 | Laminectomy for biopsy/excision of intraspinal neoplasm; intradural, intramedullary, thoracic |
| Excision by Laminectomy of Lesion Other Than Herniated Disk Procedures | 63287 | Laminectomy for biopsy/excision of intraspinal neoplasm; intradural, intramedullary, thoracolumbar |
| Excision by Laminectomy of Lesion Other Than Herniated Disk Procedures | 63290 | Laminectomy for biopsy/excision of intraspinal neoplasm; combined extradural-intradural lesion, any level |
| Excision by Laminectomy of Lesion Other Than Herniated Disk Procedures | 63295 | Osteoplastic reconstruction of dorsal spinal elements, following primary intraspinal procedure (list separately in addition to code for primary procedure) |
| Excision, Anterior or Anterolateral Approach, Intraspinal Lesion Procedures on the Spine and Spinal Cord | 63300 | Vertebral corpectomy (vertebral body resection), partial or complete, for excision of intraspinal lesion, single segment; extradural, cervical |
| Excision, Anterior or Anterolateral Approach, Intraspinal Lesion Procedures on the Spine and Spinal Cord | 63301 | Vertebral corpectomy (vertebral body resection), partial or complete, for excision of intraspinal lesion, single segment; extradural, thoracic by transthoracic approach |
| Excision, Anterior or Anterolateral Approach, Intraspinal Lesion Procedures on the Spine and Spinal Cord | 63302 | Vertebral corpectomy (vertebral body resection), partial or complete, for excision of intraspinal lesion, single segment; extradural, thoracic by thoracolumbar approach |
| Excision, Anterior or Anterolateral Approach, Intraspinal Lesion Procedures on the Spine and Spinal Cord | 63303 | Vertebral corpectomy (vertebral body resection), partial or complete, for excision of intraspinal lesion, single segment; extradural, lumbar or sacral by transperitoneal or retroperitoneal approach |
| Excision, Anterior or Anterolateral Approach, Intraspinal Lesion Procedures on the Spine and Spinal Cord | 63304 | Vertebral corpectomy (vertebral body resection), partial or complete, for excision of intraspinal lesion, single segment; intradural, cervical |
| Excision, Anterior or Anterolateral Approach, Intraspinal Lesion Procedures on the Spine and Spinal Cord | 63305 | Vertebral corpectomy (vertebral body resection), partial or complete, for excision of intraspinal lesion, single segment; intradural, thoracic by transthoracic approach |
| Excision, Anterior or Anterolateral Approach, Intraspinal Lesion Procedures on the Spine and Spinal Cord | 63306 | Vertebral corpectomy (vertebral body resection), partial or complete, for excision of intraspinal lesion, single segment; intradural, thoracic by thoracolumbar approach |
| Excision, Anterior or Anterolateral Approach, Intraspinal Lesion Procedures on the Spine and Spinal Cord | 63307 | Vertebral corpectomy (vertebral body resection), partial or complete, for excision of intraspinal lesion, single segment; intradural, lumbar or sacral by transperitoneal or retroperitoneal approach |
| Excision, Anterior or Anterolateral Approach, Intraspinal Lesion Procedures on the Spine and Spinal Cord | 63308 | Vertebral corpectomy (vertebral body resection), partial or complete, for excision of intraspinal lesion, single segment; each additional segment (list separately in addition to codes for single segment) |
|  |  |  |
|  |  |  |
| Incision Procedures on the Spine (Vertebral Column) | 22010 | Incision and drainage, open, of deep abscess (subfascial), posterior spine; cervical, thoracic, or cervicothoracic |
| Incision Procedures on the Spine (Vertebral Column) | 22015 | Incision and drainage, open, of deep abscess (subfascial), posterior spine; lumbar, sacral, or lumbosacral |
| Fracture and/or Dislocation Procedures on the Spine (Vertebral Column) | 22305 | Closed treatment of vertebral process fracture(s) |
| Fracture and/or Dislocation Procedures on the Spine (Vertebral Column) | 22310 | Closed treatment of vertebral body fracture(s), without manipulation, requiring and including casting or bracing |
| Fracture and/or Dislocation Procedures on the Spine (Vertebral Column) | 22315 | Closed treatment of vertebral fracture(s) and/or dislocation(s) requiring casting or bracing, with and including casting and/or bracing by manipulation or traction |
| Manipulation Procedures on the Spine (Vertebral Column) | 22505 | Manipulation of spine requiring anesthesia, any region |
| Vertabral Body, Embolization or Injection | 22520 | Percutaneous vertebroplasty (bone biopsy included when performed), 1 vertebral body, unilateral or bilateral injection; thoracic |
| Vertabral Body, Embolization or Injection | 22521 | Percutaneous vertebroplasty (bone biopsy included when performed), 1 vertebral body, unilateral or bilateral injection; lumbar |
| Vertabral Body, Embolization or Injection | 22522 | Percutaneous vertebroplasty (bone biopsy included when performed), 1 vertebral body, unilateral or bilateral injection; each additional thoracic or lumbar vertebral body (list separately in addition to code for primary procedure) |
| Vertabral Body, Embolization or Injection | 22523 | Percutaneous vertebral augmentation, including cavity creation (fracture reduction and bone biopsy included when performed) using mechanical device, 1 vertebral body, unilateral or bilateral cannulation (eg, kyphoplasty); thoracic |
| Vertabral Body, Embolization or Injection | 22524 | Percutaneous vertebral augmentation, including cavity creation (fracture reduction and bone biopsy included when performed) using mechanical device, 1 vertebral body, unilateral or bilateral cannulation (eg, kyphoplasty); lumbar |
| Vertabral Body, Embolization or Injection | 22525 | Percutaneous vertebral augmentation, including cavity creation (fracture reduction and bone biopsy included when performed) using mechanical device, 1 vertebral body, unilateral or bilateral cannulation (eg, kyphoplasty); each additional thoracic or lumbar vertebral body (list separately in addition to code for primary procedure) |
| Vertabral Body, Embolization or Injection | 22526 | Percutaneous intradiscal electrothermal annuloplasty, unilateral or bilateral including fluoroscopic guidance; single level |
| Vertabral Body, Embolization or Injection | 22527 | Percutaneous intradiscal electrothermal annuloplasty, unilateral or bilateral including fluoroscopic guidance; 1 or more additional levels (list separately in addition to code for primary procedure) |
| Exploration Procedures on the Spine (Vertebral Column) | 22830 | Exploration of spinal fusion |
| Spinal Instrumentation Procedures on the Spine (Vertebral Column) | 22848 | Pelvic fixation (attachment of caudal end of instrumentation to pelvic bony structures) other than sacrum (list separately in addition to code for primary procedure) |
| Other Procedures on the Spine Vertebral Column | 22899 | Unlisted procedure, spine |
| Injection, Drainage, or Aspiration Procedures on the Spine and Spinal Cord | 62263 | Percutaneous lysis of epidural adhesions using solution injection (eg, hypertonic saline, enzyme) or mechanical means (eg, catheter) including radiologic localization (includes contrast when administered), multiple adhesiolysis sessions; 2 or more days |
| Injection, Drainage, or Aspiration Procedures on the Spine and Spinal Cord | 62264 | Percutaneous lysis of epidural adhesions using solution injection (eg, hypertonic saline, enzyme) or mechanical means (eg, catheter) including radiologic localization (includes contrast when administered), multiple adhesiolysis sessions; 1 day |
| Injection, Drainage, or Aspiration Procedures on the Spine and Spinal Cord | 62267 | Percutaneous aspiration within the nucleus pulposus, intervertebral disc, or paravertebral tissue for diagnostic purposes |
| Injection, Drainage, or Aspiration Procedures on the Spine and Spinal Cord | 62268 | Percutaneous aspiration, spinal cord cyst or syrinx |
| Injection, Drainage, or Aspiration Procedures on the Spine and Spinal Cord | 62269 | Biopsy of spinal cord, percutaneous needle |
| Injection, Drainage, or Aspiration Procedures on the Spine and Spinal Cord | 62270 | Spinal puncture, lumbar, diagnostic |
| Injection, Drainage, or Aspiration Procedures on the Spine and Spinal Cord | 62272 | Spinal puncture, therapeutic, for drainage of cerebrospinal fluid (by needle or catheter) |
| Injection, Drainage, or Aspiration Procedures on the Spine and Spinal Cord | 62273 | Injection, epidural, of blood or clot patch |
| Injection, Drainage, or Aspiration Procedures on the Spine and Spinal Cord | 62280 | Injection/infusion of neurolytic substance (eg, alcohol, phenol, iced saline solutions), with or without other therapeutic substance; subarachnoid |
| Injection, Drainage, or Aspiration Procedures on the Spine and Spinal Cord | 62281 | Injection/infusion of neurolytic substance (eg, alcohol, phenol, iced saline solutions), with or without other therapeutic substance; epidural, cervical or thoracic |
| Injection, Drainage, or Aspiration Procedures on the Spine and Spinal Cord | 62282 | Injection/infusion of neurolytic substance (eg, alcohol, phenol, iced saline solutions), with or without other therapeutic substance; epidural, lumbar, sacral (caudal) |
| Injection, Drainage, or Aspiration Procedures on the Spine and Spinal Cord | 62284 | Injection procedure for myelography and/or computed tomography, spinal (other than C1-C2 and posterior fossa) |
| Injection, Drainage, or Aspiration Procedures on the Spine and Spinal Cord | 62287 | Decompression procedure, percutaneous, of nucleus pulposus of intervertebral disc, any method using needle based technique to remove disc material under fluoroscopic imaging or other form of indirect visualization, with the use of an endoscope, with discography and/or epidural injection(s) at the treated level(s), when performed, single or multiple levels, lumbar |
| Injection, Drainage, or Aspiration Procedures on the Spine and Spinal Cord | 62290 | Injection procedure for discography, each level; lumbar |
| Injection, Drainage, or Aspiration Procedures on the Spine and Spinal Cord | 62291 | Injection procedure for discography, each level; cervical or thoracic |
| Injection, Drainage, or Aspiration Procedures on the Spine and Spinal Cord | 62292 | Injection procedure for chemonucleolysis, including discography, intervertebral disc, single or multiple levels, lumbar |
| Injection, Drainage, or Aspiration Procedures on the Spine and Spinal Cord | 62294 | Injection procedure, arterial, for occlusion of arteriovenous malformation, spinal |
| Injection, Drainage, or Aspiration Procedures on the Spine and Spinal Cord | 62310 | Injection(s), of diagnostic or therapeutic substance(s) (including anesthetic, antispasmodic, opioid, steroid, other solution), not including neurolytic substances, including needle or catheter placement, includes contrast for localization when performed, epidural or subarachnoid; cervical or thoracic |
| Injection, Drainage, or Aspiration Procedures on the Spine and Spinal Cord | 62311 | Injection(s), of diagnostic or therapeutic substance(s) (including anesthetic, antispasmodic, opioid, steroid, other solution), not including neurolytic substances, including needle or catheter placement, includes contrast for localization when performed, epidural or subarachnoid; lumbar or sacral (caudal) |
| Injection, Drainage, or Aspiration Procedures on the Spine and Spinal Cord | 62318 | Injection(s), including indwelling catheter placement, continuous infusion or intermittent bolus, of diagnostic or therapeutic substance(s) (including anesthetic, antispasmodic, opioid, steroid, other solution), not including neurolytic substances, includes contrast for localization when performed, epidural or subarachnoid; cervical or thoracic |
| Injection, Drainage, or Aspiration Procedures on the Spine and Spinal Cord | 62319 | Injection(s), including indwelling catheter placement, continuous infusion or intermittent bolus, of diagnostic or therapeutic substance(s) (including anesthetic, antispasmodic, opioid, steroid, other solution), not including neurolytic substances, includes contrast for localization when performed, epidural or subarachnoid; lumbar or sacral (caudal) |
| Catheter Implantation Procedures on the Spine and Spinal Cord | 62350 | Implantation, revision or repositioning of tunneled intrathecal or epidural catheter, for long-term medication administration through an external pump or implantable reservoir/infusion pump; without laminectomy |
| Catheter Implantation Procedures on the Spine and Spinal Cord | 62351 | Implantation, revision or repositioning of tunneled intrathecal or epidural catheter, for long-term medication administration via an external pump or implantable reservoir/infusion pump; with laminectomy |
| Catheter Implantation Procedures on the Spine and Spinal Cord | 62355 | Removal of previously implanted intrathecal or epidural catheter |
| Reservoir/Pump Implantation Procedures on the Spine and Spinal Cord | 62360 | Implantation or replacement of device for intrathecal or epidural drug infusion; subcutaneous reservoir |
| Reservoir/Pump Implantation Procedures on the Spine and Spinal Cord | 62361 | Implantation or replacement of device for intrathecal or epidural drug infusion; nonprogrammable pump |
| Reservoir/Pump Implantation Procedures on the Spine and Spinal Cord | 62362 | Implantation or replacement of device for intrathecal or epidural drug infusion; programmable pump, including preparation of pump, with or without programming |
| Reservoir/Pump Implantation Procedures on the Spine and Spinal Cord | 62365 | Removal of subcutaneous reservoir or pump, previously implanted for intrathecal or epidural infusion |
| Reservoir/Pump Implantation Procedures on the Spine and Spinal Cord | 62367 | Electronic analysis of programmable, implanted pump for intrathecal or epidural drug infusion (includes evaluation of reservoir status, alarm status, drug prescription status); without reprogramming or refill |
| Reservoir/Pump Implantation Procedures on the Spine and Spinal Cord | 62368 | Electronic analysis of programmable, implanted pump for intrathecal or epidural drug infusion (includes evaluation of reservoir status, alarm status, drug prescription status); with reprogramming |
| Reservoir/Pump Implantation Procedures on the Spine and Spinal Cord | 62369 | Electronic analysis of programmable, implanted pump for intrathecal or epidural drug infusion (includes evaluation of reservoir status, alarm status, drug prescription status); with reprogramming and refill |
| Reservoir/Pump Implantation Procedures on the Spine and Spinal Cord | 62370 | Electronic analysis of programmable, implanted pump for intrathecal or epidural drug infusion (includes evaluation of reservoir status, alarm status, drug prescription status); with reprogramming and refill (requiring skill of a physician or other qualified healthcare professional) |
| Stereotaxis Procedures on the Spine and Spinal Cord | 63600 | Creation of lesion of spinal cord by stereotactic method, percutaneous, any modality (including stimulation and/or recording) |
| Stereotaxis Procedures on the Spine and Spinal Cord | 63610 | Stereotactic stimulation of spinal cord, percutaneous, separate procedure not followed by othersurgery |
| Stereotaxis Procedures on the Spine and Spinal Cord | 63615 | Stereotactic biopsy, aspiration, or excision of lesion, spinal cord |
| Stereotactic Radiosurgery (Spinal) Procedures on the Spine and Spinal Cord | 63620 | Stereotactic radiosurgery (particle beam, gamma ray, or linear accelerator); 1 spinal lesion |
| Stereotactic Radiosurgery (Spinal) Procedures on the Spine and Spinal Cord | 63621 | Stereotactic radiosurgery (particle beam, gamma ray, or linear accelerator); each additional spinallesion (list separately in addition to code for primary procedure) |
| Neurostimulators (Spinal) Procedures | 63650 | Percutaneous implantation of neurostimulator electrode array, epidural |
| Neurostimulators (Spinal) Procedures | 63655 | Laminectomy for implantation of neurostimulator electrodes, plate/paddle, epidural |
| Neurostimulators (Spinal) Procedures | 63661 | Removal of spinal neurostimulator electrode percutaneous array(s), including fluoroscopy, when performed |
| Neurostimulators (Spinal) Procedures | 63662 | Removal of spinal neurostimulator electrode plate/paddle(s) placed via laminotomy or laminectomy, including fluoroscopy, when performed |
| Neurostimulators (Spinal) Procedures | 63663 | Revision including replacement, when performed, of spinal neurostimulator electrode percutaneousarray(s), including fluoroscopy, when performed |
| Neurostimulators (Spinal) Procedures | 63664 | Revision including replacement, when performed, of spinal neurostimulator electrode plate/paddle(s) placed via laminotomy or laminectomy, including fluoroscopy, when performed |
| Neurostimulators (Spinal) Procedures | 63685 | Insertion or replacement of spinal neurostimulator pulse generator or receiver, direct or inductivecoupling |
| Neurostimulators (Spinal) Procedures | 63688 | Revision or removal of implanted spinal neurostimulator pulse generator or receiver |
| Repair Procedures on the Spine and Spinal Cord | 63700 | Repair of meningocele; less than 5 cm diameter |
| Repair Procedures on the Spine and Spinal Cord | 63702 | Repair of meningocele; larger than 5 cm diameter |
| Repair Procedures on the Spine and Spinal Cord | 63704 | Repair of myelomeningocele; less than 5 cm diameter |
| Repair Procedures on the Spine and Spinal Cord | 63706 | Repair of myelomeningocele; larger than 5 cm diameter |
| Repair Procedures on the Spine and Spinal Cord | 63707 | Repair of dural/cerebrospinal fluid leak, not requiring laminectomy |
| Repair Procedures on the Spine and Spinal Cord | 63709 | Repair of dural/cerebrospinal fluid leak or pseudomeningocele, with laminectomy |
| Repair Procedures on the Spine and Spinal Cord | 63710 | Dural graft, spinal |
| Shunt, Spinal CSF Procedures | 63740 | Creation of shunt, lumbar, subarachnoid-peritoneal, -pleural, or other; including laminectomy |
| Shunt, Spinal CSF Procedures | 63741 | Creation of shunt, lumbar, subarachnoid-peritoneal, -pleural, or other; percutaneous, not requiringlaminectomy |
| Shunt, Spinal CSF Procedures | 63744 | Replacement, irrigation or revision of lumbosubarachnoid shunt |
| Shunt, Spinal CSF Procedures | 63746 | Removal of entire lumbosubarachnoid shunt system without replacement |

CPT = Current Procedural Terminology.
